# Supplementary material for: The Signal Transduction Protein PII Controls the Levels of the Cyanobacterial Protein PipX
Source: MDPI journal article supplement (doi:10.3390/microorganisms11102379), 2023-09-23
Supplement: s1 [file s1]

**Table S1.** Oligonucleotides.

| <b>Name</b> | <b>Sequence (5'— 3')</b>                   |
|-------------|--------------------------------------------|
| GlnB-1F     | GGCTTAAGGAGAATTCCCTTGAAGAAG                |
| GlnB-1R     | AACTGCAGTCGACGCTGACTTAGATTGCGTCG           |
| PipX-126F   | TAAAAACTAGCCGCCCTTGC                       |
| PipX-5R     | CAGCCCGCAAATCAGCAG                         |
| PipX-H9A-1F | CTACCTCAACGCTCCACCTTCG                     |
| PipX-H9A-1R | CGAAGGTGGGAGCGTTGAGGTAG                    |
| PipX-Y16A-F | CCCACCTTCGGATTGCTCGCCCAAATCTGCAGC          |
| PipX-Y16A-R | GCTGCAGATTTGGGCGAGCAATCCGAAGGTGGG          |
| PipX-R70A-F | CCGTCTGCGCCAGCTGCGCGCAGATGCCAGTCTGCAGGAATA |
| PipX-R70A-R | TATTCCTGCAGACTGGCATCTGCGCGCAGCTGGCGCAGACGG |
| PipX-L80Q-F | GCAGGAATACAACCAGCAGCAGCAAGTCTTCAAAC        |
| PipX-L80Q-R | GTTTGAAGACTTGCTGCTGCTGGTTGTATTCCTGC        |
